# Supplementary material
Source: publisher site journal article supplement (https://www.dovepress.com/article/340662)
Supplement: Supplementary file 1 [file get_supplementary_file.php]

**Table S1.** Oligonucleotide sequences used in this study

| Primer | Sequence (5'to3') | Target genes | Length of production (bp) |
| --- | --- | --- | --- |
| OXA-10 -F | ATGGTGTCTTCGTGCTTT | *bla*OXA-10-like | 281 |
| OXA-10 -R | TCTTACTTCGCCAACTTCT |
| OXA-2 -F | CGCTGTTCGTGATGAGTTCC | *bla*OXA-2-like | 193 |
| OXA-2 -R | ATCGGCGTTGCCATAGTC |
| OXA-677-F-EcoRI | CGGAATTCGCCATGAAAACATTTGCCGCATATG | *bla*OXA-677 | 822 |
| OXA-677-R-BamHI | CGCGGATCCGTTAGCCACCAATGATGCCC |
| IMP-F | TTAACGGTTGGGGTGTTGTT | *bla*IMP | 177 |
| IMP-R | CTGTGCTGTCGCTATGGAAA |
| VIM-F | ACTTCTCGCGGAGATTGAGA | *bla*VIM | 203 |
| VIM-R | CGCTCGATGAGAGTCCTTCT |
| NDM/AFM-F | GGTTTGGCGATCTGGTTTTC | *bla*NDM/AFM | 621 |
| NDM/AFM-R | CGGAATGGCTCATCACGATC |
| KPC-F | CGTCTAGTTCTGCTGTCTTG | *bla*KPC | 798 |
| KPC-R | CTTGTCATCCTTGTTAGGCG |
